# Supplementary material for: Modulation of innate immune responses at birth by prenatal malaria exposure and association with malaria risk during the first year of life
Source: Springer Nature journal article supplement (doi:10.1186/s12916-018-1187-3), 2018-10-25

Figure S1

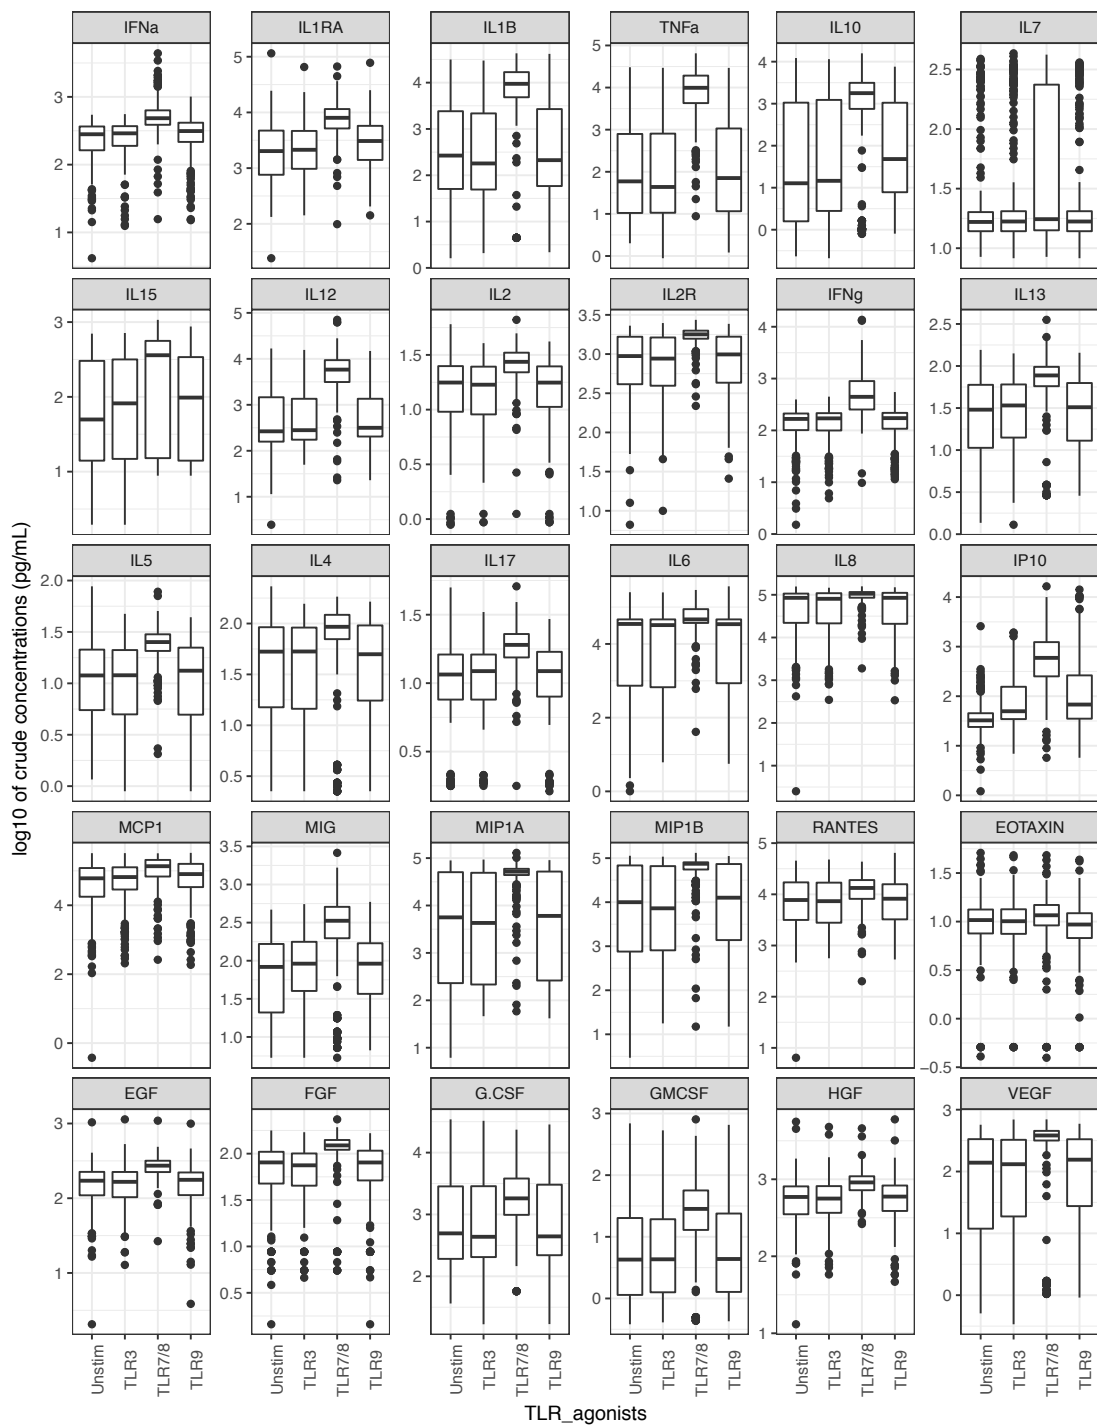

Figure S2

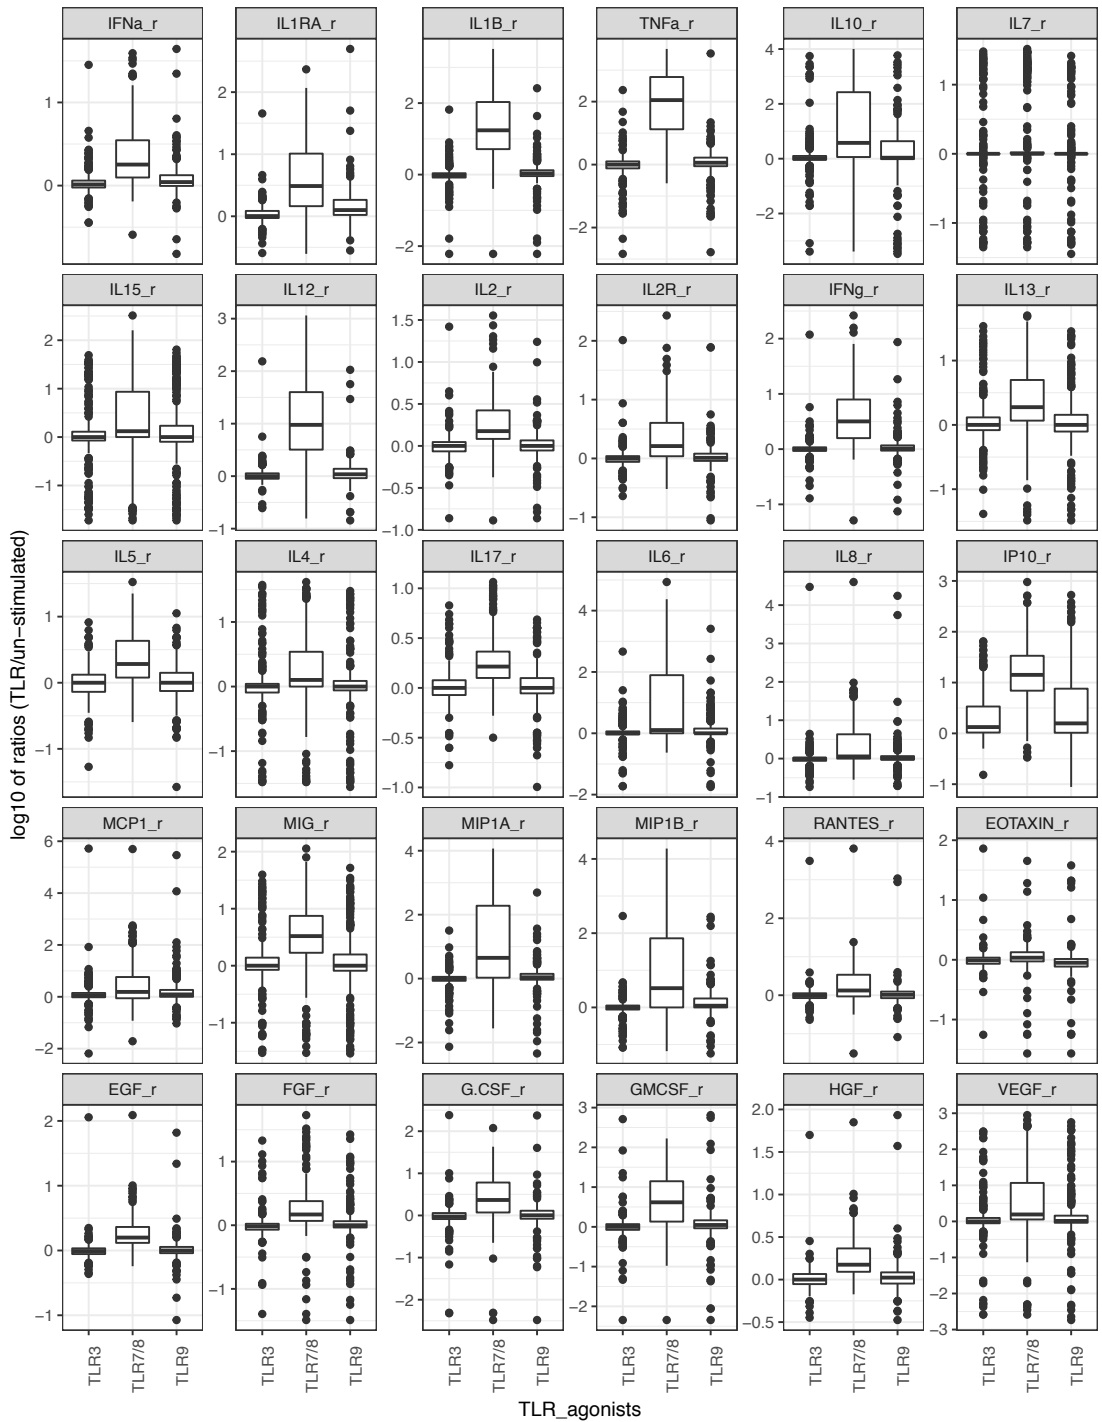

Supplement: MOESM1 [file 16247186]
