# Supplementary material for: Modulation of innate immune responses at birth by prenatal malaria exposure and association with malaria risk during the first year of life
Source: Springer Nature journal article supplement (doi:10.1186/s12916-018-1187-3), 2018-10-25

**Figure S3**

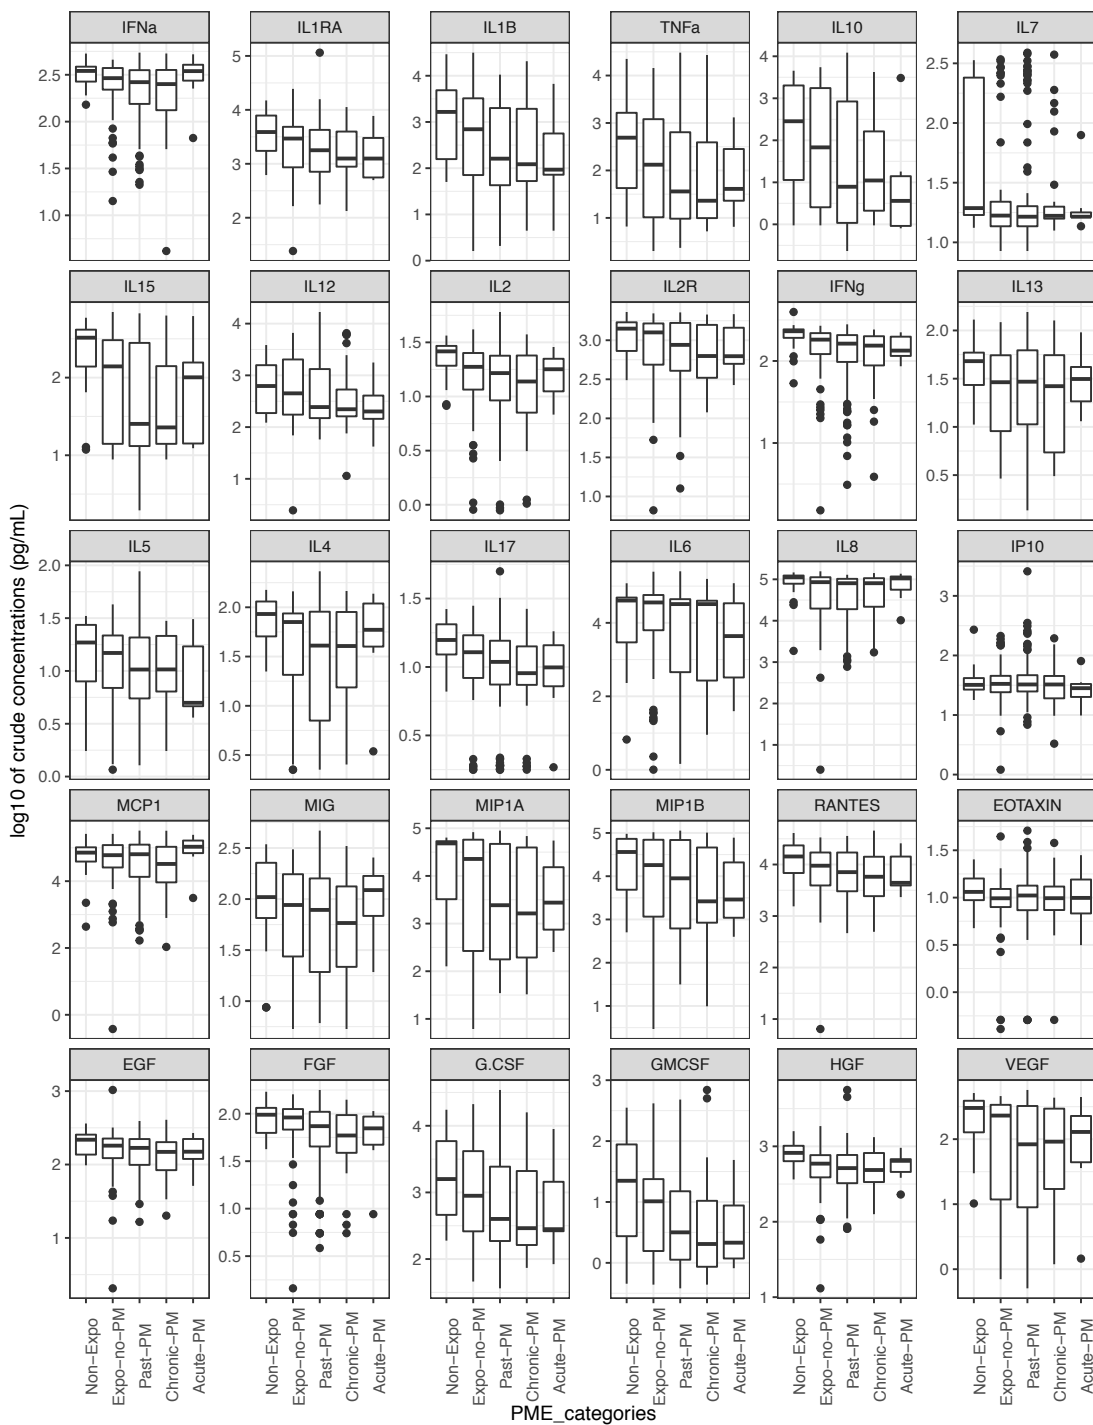

Figure S4

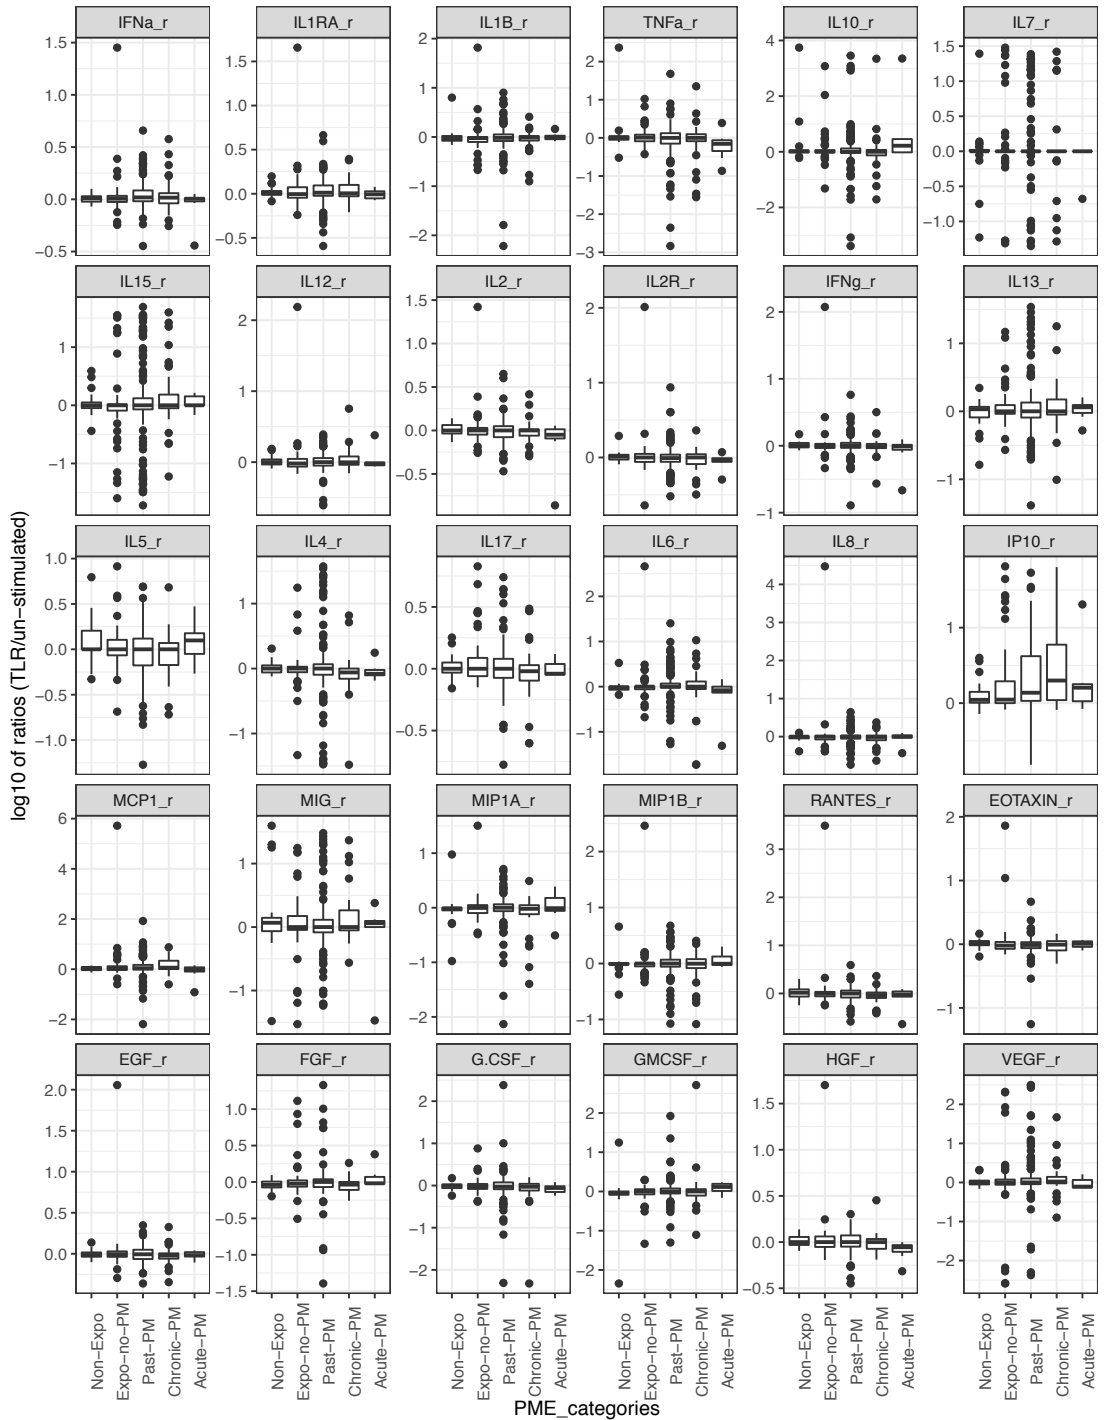

Figure S5

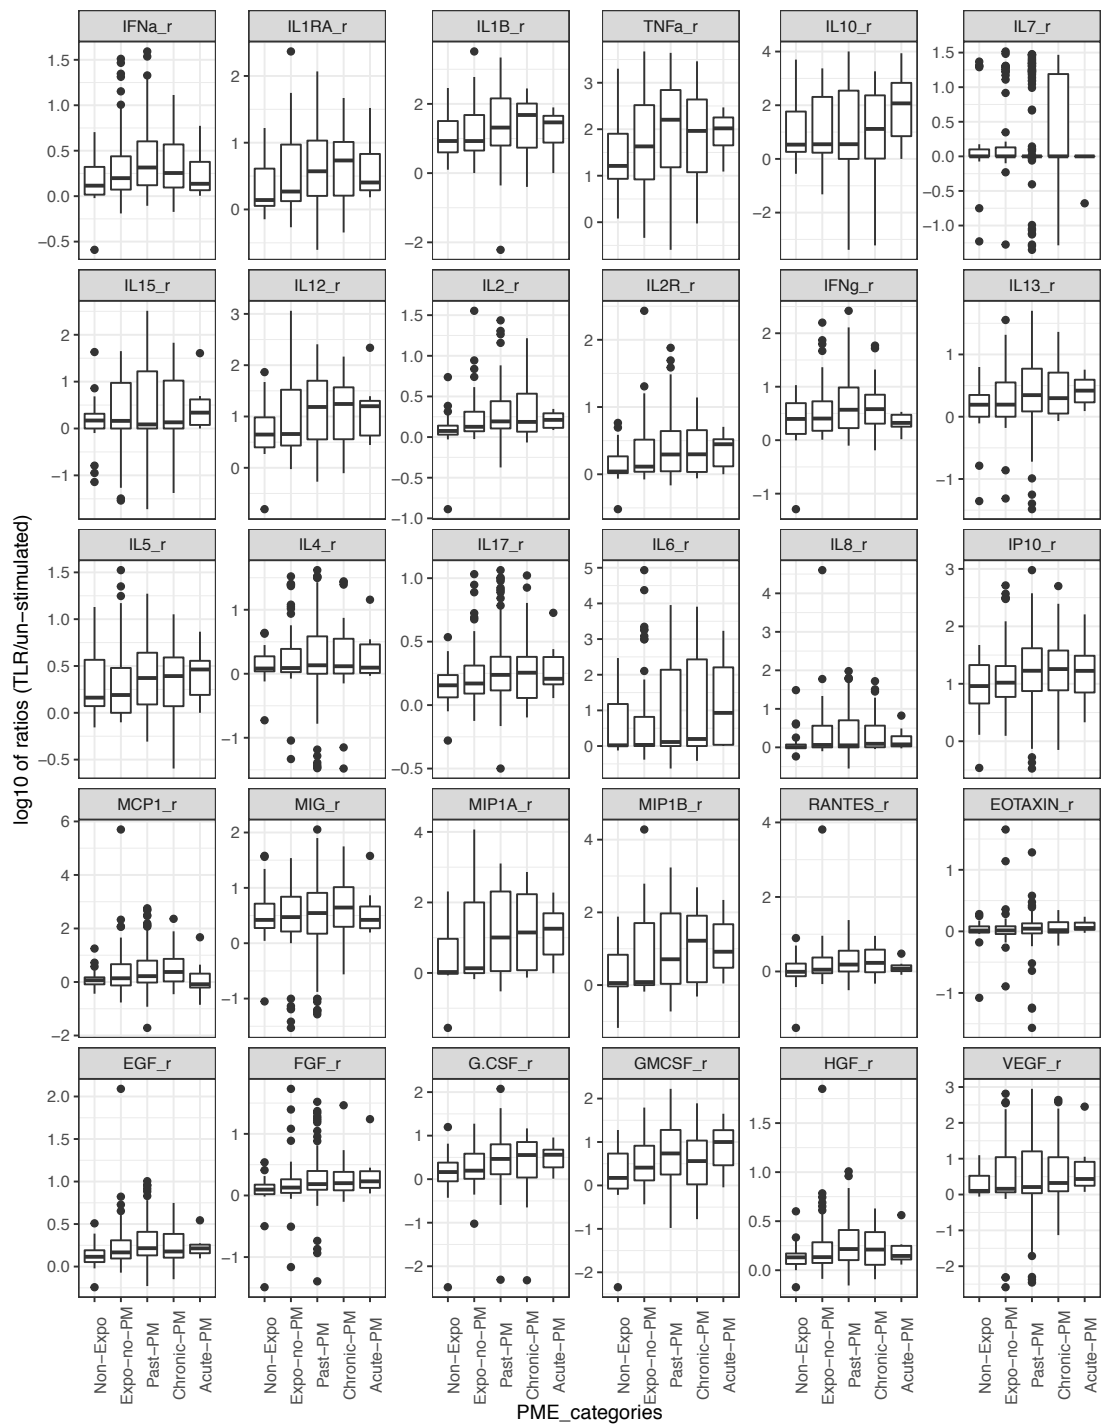

Supplement: MOESM2 [file 16247186]
