# Supplementary material for: Modulation of innate immune responses at birth by prenatal malaria exposure and association with malaria risk during the first year of life
Source: BMC Med. 2018 Nov 2;16:198. doi: 10.1186/s12916-018-1187-3 (PMC6214168; doi:10.1186/s12916-018-1187-3)
Supplement: Supplementary file 3 — Table S1. Variables included in the linear regression models assessing the effect of prenatal malaria exposure on TLR-mediated cytokine responses at birth. (PDF 88 kb) [file 12916_2018_1187_MOESM3_ESM.pdf]

**Table S1**

| <b>Cytokines</b>  |                | <b>Variables included in the models</b> |                      |                                   |                         |
|-------------------|----------------|-----------------------------------------|----------------------|-----------------------------------|-------------------------|
|                   |                | <b>Un-stimulated</b>                    | <b>TLR3 (ratios)</b> | <b>TLR7/8 (ratios)</b>            | <b>TLR9 (ratios)</b>    |
| Pro-inflammatory  | IFN- $\alpha$  | PME, birth season, sex                  | None                 | PME, birth season, gravidity, sex | Birth season, sex       |
|                   | IL-1RA         | PME, gravidity                          | None                 | PME, birth season, gravidity      | Birth season, gravidity |
|                   | IL-1 $\beta$   | PME, birth season                       | None                 | PME, Ethnicity                    | LBW                     |
|                   | TNF- $\alpha$  | PME, birth season                       | None                 | PME, birth season                 | Birth season            |
| Anti-inflammatory | IL-10          | PME, birth season                       | None                 | Ethnicity, sex                    | None                    |
|                   | IL-7           | PME                                     | None                 | None                              | Gravidity               |
| Th1-type          | IL-15          | PME, birth season                       | None                 | None                              | None                    |
|                   | IL-12          | Birth season                            | None                 | PME, birth season                 | Birth season            |
|                   | IL-2           | PME, birth season, gravidity, sex       | None                 | PME, birth season, gravidity, sex | None                    |
|                   | IL-2R          | Birth season, sex                       | None                 | PME, birth season                 | None                    |
|                   | IFN- $\lambda$ | PME, birth season, sex                  | None                 | PME                               | None                    |
| Th2-type          | IL-13          | PME                                     | None                 | PME, gravidity                    | Gravidity               |
|                   | IL-5           | Birth season                            | PME, sex             | None                              | PME                     |
|                   | IL-4           | PME, birth season                       | None                 | None                              | None                    |
| Th17-type         | IL-17          | PME, birth season                       | None                 | PME, birth season                 | None                    |
|                   | IL-6           | Birth season                            | None                 | Birth season                      | None                    |
| Chemokines        | IL-8           | Birth season                            | None                 | None                              | None                    |
|                   | IP10           | Birth season, gravidity                 | PME, birth season    | Birth season, gravidity           | Birth season, gravidity |
|                   | MCP-1          | None                                    | None                 | Birth season, gravidity           | None                    |
|                   | MIG            | Birth season                            | None                 | None                              | None                    |
|                   | MIP-1 $\alpha$ | PME, birth season                       | None                 | PME, birth season                 | Birth season            |
|                   | MIP-1 $\beta$  | Birth season                            | None                 | PME, birth season                 | Birth season            |
|                   | RANTES         | PME, birth season                       | None                 | PME, birth season, sex            | None                    |
|                   | EOTAXIN        | Birth season                            | Gravidity            | Gravidity                         | Gravidity               |
| Growth factors    | EGF            | PME, birth season                       | None                 | PME                               | None                    |
|                   | FGF            | PME, birth season                       | None                 | PME                               | PME                     |
|                   | G-CSF          | PME, birth season                       | None                 | PME                               | PME                     |
|                   | GM-CSF         | PME, birth season                       | None                 | PME                               | None                    |
|                   | HGF            | PME                                     | None                 | PME, birth season                 | None                    |
|                   | VEGF           | PME, birth season                       | None                 | None                              | None                    |

PME, prenatal malaria exposure.
